# Supplementary material
Source: publisher figshare collection journal article supplement (https://brill.figshare.com/ndownloader/files/38654183)
Supplement: Supplementary file 1 [file 38654183]

## Sheet: Table S1
Table S1. The details of gladiolus genotypes involved in the present study.
Genotype ID	Genotype name	Source/availability of planting material
1	Anglia	ICAR-IARI, New Delhi
2	Amethyst	CSIR-NBRI, Lucknow
3	Pusa Gunjan	ICAR-IARI, New Delhi
4	Punjab Glad 1	PAU, Ludhiana
5	Aldebaran	CSIR-NBRI, Lucknow
6	Fire Flame	ICAR-IIHR, Bengaluru
7	Tiger Flame	CSIR-NBRI, Lucknow
8	Kalima	CSIR-NBRI
9	Neelima	CSIR-NBRI, Lucknow
10	GS-2	ICAR-IARI, New Delhi
11	Praha	CSIR-NBRI, Lucknow
12	Anjali	ICAR-IARI, New Delhi
13	Malaviya Shatabdi	BHU, Varanasi, UP
14	Roshni	CSIR-NBRI, Lucknow
15	Yellow Stone	PAU, Ludhiana
16	Dhanvantari	ICAR-IARI, New Delhi
17	Punjab Morning	PAU, Ludhiana
18	Rose Supreme	PAU, Ludhiana
19	Punjab Glance	PAU, Ludhiana
20	Sancerre	ICAR-IARI, New Delhi
21	Pusa Shagun	ICAR-IARI, New Delhi
22	Punjab Glad 2	PAU, Ludhiana
23	Pusa Shabnam	ICAR-IARI, New Delhi
24	Punjab Dawn	PAU, Ludhiana
25	Arka Tilak	ICAR-IIHR, Bengaluru
26	Victor	ICAR-IARI, New Delhi
27	Pusa Lohit	ICAR-IARI, New Delhi
28	Malaviya Kiran	BHU, Varanasi, UP
29	Pusa Manmohak	ICAR-IARI, New Delhi
30	Pusa Sindhuri	ICAR-IARI, New Delhi
31	Arka Nazrana	ICAR-IIHR, Bengaluru
32	Nova Lux	CSIR-NBRI, Lucknow
33	Euro Vision	CSIR-NBRI, Lucknow
34	Lady Jane	ICAR-IIHR, Bengaluru
35	Jacksonville Gold	PAU, Ludhiana
36	Punjab Lemon Delight	PAU, Ludhiana
37	Arka Aayush	ICAR-IIHR, Bengaluru
38	Pusa Sringarika	ICAR-IARI, New Delhi
39	Pusa Red Valentine	ICAR-IARI, New Delhi
40	Neel Rekha	ICAR-IARI, New Delhi
41	Yellow Star	BHU, Varanasi
42	Creamy Green	ICAR-IARI, New Delhi
43	Friendship	ICAR-IARI, New Delhi
44	Pink Lady	ICAR-IARI, New Delhi
45	Arka Sapna	ICAR-IIHR, Bengaluru
46	Arka Kesar	ICAR-IIHR, Bengaluru
47	Pusa Suhagin	ICAR-IARI, New Delhi
48	Pusa Urmi	ICAR-IARI, New Delhi
49	Pusa Chirag	ICAR-IARI, New Delhi
50	Nicole	CSIR-NBRI, Lucknow
51	Pusa Archana	ICAR-IARI, New Delhi
52	Arka Darshan	ICAR-IARI, New Delhi
53	Plumtart	ICAR-IARI, New Delhi
54	Pusa Sarang	ICAR-IARI, New Delhi
55	Fidelio	CSIR-NBRI, Lucknow
56	Urmil	ICAR-IARI, New Delhi
57	Lucky Shamrock	ICAR-IARI, New Delhi
58	Delhi Callianthus	ICAR-IARI, New Delhi
59	Pusa Urvashi	ICAR-IARI, New Delhi
60	Pusa Chandni	ICAR-IARI, New Delhi
61	Suchitra	ICAR-IARI, New Delhi
62	Surya Kiran	ICAR-IARI, New Delhi
63	Arka Amar	ICAR-IIHR, Bengaluru
64	True Love	CSIR-NBRI, Lucknow
65	Peter Pear's	ICAR-IARI, New Delhi
66	Pusa Shweta	ICAR-IARI, New Delhi
67	Arka Poonam	ICAR-IIHR, Bengaluru
68	Pusa Srijana	ICAR-IARI, New Delhi
69	Pusa Gulal	ICAR-IARI, New Delhi
70	Vicki Lin	ICAR-IARI, New Delhi
71	African Star	ICAR-IARI, New Delhi
72	Arka Gold	ICAR-IIHR, Bengaluru
73	Pusa Kiran	ICAR-IARI, New Delhi
74	Arka Aarti	ICAR-IIHR, Bengaluru
75	Arka Naveen	ICAR-IIHR, Bengaluru
76	Apple Blossom	ICAR-IARI, New Delhi
77	Punjab Pink Elegance	PAU, Ludhiana
78	Vink's Glory	CSIR-NBRI, Lucknow
79	Pusa Bindiya	ICAR-IARI, New Delhi
80	Pusa Mohini	ICAR-IARI, New Delhi
81	Summer Sunshine	ICAR-IARI, New Delhi
82	Algarve	ICAR-IARI, New Delhi
83	Malaviya Kundan	BHU, Varanasi, UP
84	C.P.G	PAU, Ludhiana

## Sheet: Table S2
Sl.No	Genotypes	Plant height	Length of leaf blade	Width of leaf blade	Rachis length (cm)	No of florets / spike	Bract length	Flower length	Flower width	Tepal length	Tepal width	Androecium length	Anther length	Stigma lobe legth	Style length	Time of beginning of flowering	Duration of flowering	Corm diameter (cm)	Corm fresh weight (g)
1	Anglia	49.08	36.33	2.85	32	13.67	4.55	8.62	7.75	5.1	3.43	4.72	1.35	0.87	6.12	110.33	12	5.82	44.17
2	Amethyst	50.5	37.08	2.98	33.08	13	4.07	9.03	8.87	5.6	3.33	4.9	1.5	0.63	5.78	100.17	21.83	5.29	40.5
3	Pusa Gunjan	61	46.78	3.57	36.33	13.58	5.3	10.35	9.5	6.47	5.47	4.85	1.17	0.73	6.3	100.67	17.83	5.61	40.75
4	Punjab Glad 1	55.58	44.08	3.25	39.17	15.42	5.85	9.53	8.65	6.35	3.97	5.37	1.7	0.78	6	93	24.83	4.45	29.67
5	Aldebaran	63.17	50.25	2.94	32.42	11.08	5.87	9.02	8.88	5.72	3.9	5.2	1.58	0.75	6	106.5	15.33	5.51	36.75
6	Fire Flame	60.33	48	3.62	33.42	12.58	3.53	9.67	8.83	5.77	3.93	4.63	1.33	1.07	5.53	77.67	11	6.35	60
7	Tiger Flame	67.08	51.75	2.86	44.67	15.5	5.65	9.88	8.95	5.88	4.33	4.27	1.17	0.57	6.13	116.17	14	5.29	51.25
8	Kalima	49.33	39	2.2	36.42	14.08	5	10.9	9.57	6.27	3.5	4.2	1.2	0.83	6.07	115.5	14.5	4.34	25.5
9	Neelima	52.58	42.83	3.33	31.33	13.33	5.35	8.87	9.53	5.85	3.77	4.7	1.33	0.7	5.87	115	11.17	4.76	27.08
10	GS-2	59.17	46.17	3.74	41.75	11.75	4.97	9.3	9.4	6.17	4.98	4.4	1.38	0.88	5.78	103	18.33	5.72	40.08
11	Praha	78	62.25	3.03	32	11.58	6.18	11.17	9.75	6.82	3.78	5.25	1.78	0.47	7.02	109.67	15.5	6.03	56.33
12	Anjali	52.5	33.5	2.64	37.67	15.17	5.87	10.4	9.43	6.13	4.33	4.07	1.33	1.27	5.63	117.67	16.83	4.87	36.83
13	Malaviya Shatabdi	52.58	41.17	2.41	34.92	13.75	4.67	8.83	8.57	6.32	3.78	4.5	1.43	0.57	5.87	72.33	36.5	4.87	30.83
14	Roshni	62.42	41.67	4.3	42.25	12.58	4.82	10.4	9.72	6.95	3.67	4.67	1.43	0.65	6.18	88.67	25	5.82	62.42
15	Yellow Stone	62.67	45.92	2.94	40.17	14.75	5.07	9.45	8.62	5.7	4.27	4.85	1.47	0.77	6.23	87.33	30.17	5.29	51.58
16	Dhanvantari	72.5	52.33	3.18	29.67	10.92	6.45	9.85	8.92	6.35	3.6	5.05	1.48	0.73	6.27	96.17	17.83	5.93	53.58
17	Punjab Morning	53.75	43	2.24	32.08	13.83	4.55	9.3	8.77	5.85	3.6	4.47	1.37	0.55	5.87	109.33	12.67	4.66	32.83
18	Rose Supreme	74.58	60.58	2.86	45.08	16.17	4.47	9.42	9.67	6.47	4.22	4.5	1.07	0.92	5.57	110.5	12.5	5.29	50.83
19	Punjab Glance	50	38.5	2.58	39.92	13.17	5.2	9.13	7	6.03	3.78	4.52	1.2	0.73	6.78	90.17	13.5	5.29	45.42
20	Sancerre	60.92	46.67	3.8	33.83	13.92	5.97	10.55	9.43	6.08	3.93	4.83	1.3	0.7	6.83	104.83	13.17	5.19	49.83
21	Pusa Shagun	70.83	56.67	2.94	33.83	12.83	6.43	10.55	9.23	6.32	3.6	5.3	1.52	0.5	6.42	115.33	12	5.19	44.92
22	Punjab Glad 2	54.17	45.33	2.89	44.83	16.33	4.53	9.7	8.83	5.93	4.43	4.7	1.18	0.73	6.12	87.33	16.83	5.51	40.83
23	Pusa Shabnam	68.58	45.67	2.59	51.17	17.5	3.93	8.6	9.22	5.88	3.55	4.88	1.2	0.6	6.78	90	23.33	5.93	52.33
24	Punjab Dawn	54.67	43.25	2.63	32.42	14.25	4.83	9.6	8.8	5.77	3.85	4.85	1.37	0.6	6.2	97.5	15.83	4.24	34.5
25	Arka Tilak	51.17	41.83	3.83	39.5	13.83	6.45	10.85	10.38	7	4.65	4.8	1.5	1.2	5.63	120	16.67	5.72	53.75
26	Victor	77.5	55.08	3.82	23.25	8.42	6.87	10.75	9.73	6.4	4.97	4.38	1.15	0.67	6.67	115	6.83	6.88	90.83
27	Pusa Lohit	54.17	40.33	2.51	18.5	7.33	4	9.6	8.43	6	4.5	4.87	1.47	0.57	5.13	109	7.5	5.29	36.5
28	Malaviya Kiran	48.75	35.42	2.15	36.17	12.08	4.48	8.02	8.4	5.78	3.87	4.32	1.07	0.62	6	108	9.33	3.92	23.08
29	Pusa Manmohak	55.83	43.92	3.61	40.25	15.17	5.1	9.65	9.72	6.43	4.07	4.27	1.12	0.77	5.87	110.83	16.33	4.66	37.5
30	Pusa Sindhuri	59	44.42	3.14	48	16	5.32	9.1	9.2	6.4	4.5	5.65	1	0.7	6.33	107.67	19.67	5.4	43.83
31	Arka Nazrana	48.25	37.33	2.5	29	13.33	4.42	8.92	7.85	5.38	2.97	4.23	1.12	0.53	3.88	95.67	20.67	6.35	59.08
32	Nova Lux	63.92	46.58	3	43.33	16.5	5.78	9.47	7.88	5.88	3.72	4.63	1.28	1	6.37	107.17	19	5.61	53.33
33	Euro Vision	60.08	48.33	3.28	50.08	16.75	5.17	10.33	8.1	5.9	4.07	4.5	0.63	0.73	5.93	107.83	12	4.34	39.25
34	Lady Jane	47.58	37.25	2.57	39.08	14.42	4.57	8.33	6.8	5.5	3.6	4	0.97	0.9	5.77	104	23.33	4.55	32.75
35	Jacksonville Gold	64.83	48.5	3.39	36.5	14.92	6.3	9.03	7.68	5.42	3.18	4.75	1.57	0.78	6.12	113.5	21.83	5.5	72.67
36	Punjab Lemon Delight	50.08	42	2.67	25.67	11.33	4.85	9.25	7.7	5.65	3.37	4.83	1.27	0.58	5.55	102	14.67	4.34	29.08
37	Arka Aayush	48.5	37.83	3.24	35.25	16.75	4.37	8.6	7.75	5.43	3.9	3.78	0.93	0.8	5.55	114.5	7.67	5.93	58.75
38	Pusa Sringarika	61.08	47	3.17	37.5	11.5	4.47	10.18	9.57	6.28	5.18	5.33	1.32	0.6	6.53	119	13.33	5.29	36.17
39	Pusa Red Valentine	59.33	45.25	4.16	44.5	14.67	3.73	8.9	8.78	5.87	4.4	4.68	1.18	0.75	6.12	101.33	21.33	5.72	52.33
40	Neel Rekha	63.75	46.92	2.8	34.08	12.58	3.73	8.63	7.7	5.47	3.1	4.67	1.43	0.47	5.5	89.5	10.17	6.35	67.42
41	Yellow Star	50	38.58	2.96	32.42	11.83	5.42	9.53	9.58	5.42	5.28	4.32	1.45	0.75	6.07	117.17	8.5	4.13	34.25
42	Creamy Green	51.92	39.25	4.3	32.42	11.92	5.07	9.7	8.95	6.05	3.03	4.93	1.43	0.5	6.43	99.5	19.83	5.82	39.58
43	Friendship	65.33	51.33	3.18	41.67	12.58	4.37	10	9.43	6.57	5.1	4.47	1	1.03	6.13	122.5	8.5	4.98	37.08
44	Pink Lady	56.67	41.08	3.37	28.67	11.17	4.73	9.87	8.55	5.97	5.12	4.75	1.12	0.77	5.7	103.83	20.83	5.29	50.5
45	Arka Sapna	45.42	37	3.18	45.58	15.92	4.07	9.75	8.13	5.6	3.83	4.32	1.23	0.52	5.57	85.33	10.83	5.29	45
46	Arka Keshar	61.83	46	3.54	46.17	15.17	5.05	9.82	9.07	6.83	4.37	5.08	1.38	0.53	6.15	89.83	24.5	5.61	36.67
47	Pusa Suhagin	43.58	35.5	2.21	44.5	12.83	5.15	10.22	9.27	6.55	3.85	4.63	1.07	0.67	6	114.83	15.17	4.34	24.58
48	Pusa Urmi	59.67	45	3.67	29.75	11.75	4.07	8.6	8.78	5.18	3.75	4.67	1.25	0.5	5.65	96.17	12.5	5.51	50.5
49	Pusa Chirag	53.33	38.75	3.64	38.75	14.17	4.93	8.07	7.5	5.35	3.6	4.78	1.38	0.6	6.25	107.67	11.83	4.98	46.5
50	Nicole	53.08	43.67	2.4	52.25	16.75	5	10.5	9.62	6.35	4.08	5	1.52	0.75	5.98	106.33	12.83	6.03	50.67
51	Pusa Archana	67.92	49.83	2.67	29.67	12.75	3.67	8.38	8.65	5.57	3.73	4.75	1.18	0.48	5.85	106	12.5	5.29	38.58
52	Arka Darshan	50	37.92	2.47	27.33	12.33	4.03	8.88	7.85	5.98	4	4.28	1.28	0.8	5.53	104.33	11.5	5.29	35.42
53	Plumtart	64.17	37.17	2.98	28.83	12.25	4.92	8.72	7.9	5.28	4.05	4.65	1.03	0.62	5.37	108.5	12	5.51	50.17
54	Pusa Sarang	69.75	54.17	3.46	32.25	12.5	4.05	9.6	10.58	6.78	4.35	4.32	1.28	0.6	5.6	101	15.5	6.24	55.25
55	Fidelio	51.08	38.42	2.49	31	10.17	3.73	7.07	6.77	5.6	4.57	4.13	1.3	0.47	5.87	106.33	12.17	5.08	24.83
56	Urmil	52.42	42.08	2.79	31.75	10.92	4.17	9.63	9.27	6.8	4.37	4.93	1.1	0.67	5.63	93.83	12.17	5.82	39.42
57	Lucky Shamrock	68.5	49	3.29	26.92	10.42	5.25	9.87	8.88	6.27	4.57	4.78	1.47	0.65	6.47	110.5	14.67	6.14	60
58	Delhi Callianthus	57	43.75	3.18	35	13.75	4.23	9.18	8.55	5.97	3.45	4.3	0.98	0.65	5.82	108.67	13	6.24	46.42
59	Pusa Urvashi	52.83	39.42	2.97	32.33	14.58	3.47	7.85	8.02	4.93	3.37	4.67	1	0.5	5.08	95.33	20.33	5.82	52.5
60	Pusa Chandni	62.67	44.67	2.94	36.17	13	3.93	8.47	7.9	5.07	3.47	4.37	1.4	0.83	5.97	94.17	15.33	5.51	45.58
61	Suchitra	54.5	40.67	3	35.83	12.75	4.77	8.93	8.43	5.5	3.43	5	1.37	0.67	6.5	93.5	20.33	5.61	52.83
62	Surya Kiran	54.17	37.17	2.54	28.83	10.67	4.05	9.9	9	5.68	3.68	5.38	1.25	0.85	7.3	99	11.33	4.45	28.25
63	Arka Amar	57.17	45.58	3.01	37.83	15.25	6.08	9.88	9.03	6.23	3.47	5.25	1.37	0.6	5.57	116.33	12.67	5.93	49.08
64	True Love	52.33	39.5	2.5	38.5	14.08	5.17	10.6	11.13	7.6	3.67	4.63	1.57	0.97	6.13	118.67	16.83	4.87	26.83
65	Peter Pear's	63.58	46.5	2.59	27.25	10.67	5.03	9.5	9.2	5.98	4.02	4.67	1.35	0.6	5.38	90.33	20.5	5.29	51.17
66	Pusa Shweta	54.83	40.5	3.27	31.33	11.42	5	9.92	9.9	6.23	3.98	5.03	1.35	0.57	6.42	112.5	9.5	6.14	56.17
67	Arka Poonam	54.08	42	3.91	43	18.17	3.75	8.23	7.87	4.53	2.5	4.15	1.35	0.6	5.95	114.5	9	4.76	56.58
68	Pusa Srijana	50.08	38.58	3.5	27.29	11.33	5.7	8.48	8.42	4.72	3.7	4.3	1.18	0.5	6.32	97	13.67	4.87	43
69	Pusa Gulal	51.75	39.17	3.49	27.75	13.17	3.83	8.57	8.43	5.1	3.67	4.03	0.53	0.57	4.87	100.5	9	5.93	54.42
70	Vicki Linn	60.75	47.42	3.64	28.08	10.83	5.6	9.88	9.63	5.75	4.48	4.83	1.5	0.8	6.18	101.33	8.17	6.88	73.5
71	African Star	57.33	40.5	2.3	25	12.25	4.63	9.3	9.08	5.75	3.82	4.47	1.32	0.63	5.53	112.5	7.33	4.76	27.58
72	Arka Gold	60.08	47.67	3.48	29.92	9.58	4.53	9.12	8.47	5.58	4.57	4.62	1.37	0.78	5.1	114.83	8.67	6.35	59
73	Pusa Kiran	63.25	43.17	2.72	34.08	13.67	4.2	9.08	8.7	5.33	3.52	4.75	1.03	0.68	5.9	92.5	15.83	5.29	41.08
74	Arka Aarti	58.83	44.33	2.43	27	9.67	5.77	9.65	9.53	6.4	3.7	4.73	1.08	0.72	6.8	107	9.67	5.72	48.25
75	Arka Naveen	52	40.33	2.72	40.17	14.17	7.03	9.32	7.82	5.23	4.83	4.13	1.33	0.57	5.47	113.33	7.33	4.97	39
76	Apple Blossom	63.58	49.42	2.63	30.75	10.17	3.67	8.53	8.03	5.1	3.1	3.9	1.37	0.67	5.53	85.33	11.83	6.14	51.25
77	Punjab Pink Elegance	46.75	36.08	2.77	40.25	16.42	4.4	9.3	8.43	5.95	3.23	4.2	1.13	0.53	5.1	103.5	14.17	4.66	35.67
78	Vink's Glory	57.33	45.83	1.81	29.58	9.92	4.92	9	7.22	5.05	3.63	4.38	1.3	0.67	6.25	106.33	9.33	5.82	47.67
79	Pusa Bindiya	65.5	50.33	2.92	32.08	12.75	6.25	9.72	8.8	6.1	3.95	4.43	1.17	0.63	6.28	104.17	10.33	5.29	40.25
80	Pusa Mohini	66.92	50.75	3.32	36.83	12.83	4.95	9	8.65	6.62	4.42	4.57	1.13	0.79	5.57	106.33	12	5.93	55
81	Summer Sunshine	60.83	42.83	3.2	35.83	11.67	5.5	9.93	9.3	8.47	5.7	4.77	1.5	0.87	7.47	118	9.17	4.66	39
82	Algarve	64.33	43	2.57	38.17	11.17	4.63	10	9.9	8.33	5.1	4.17	1.2	1.37	6.67	116	10.33	5.51	34.17
83	Malaviya Kundan	51.92	39.75	2.5	31.92	11.5	5.37	9.37	7.7	5.17	3.43	4.43	1.23	0.6	5.4	118.33	12.67	3.92	23.25
84	C.P.G	40.42	30.33	2.42	37.75	13.58	4.65	9.33	8.22	5.72	2.9	4.48	1.22	0.83	5.73	115.67	13.33	4.34	28
	Mean	57.73	43.7	3.01	35.35	13.1	4.9	9.4	8.76	5.96	3.97	4.63	1.27	0.7	5.96	104.39	14.65	5.36	44.64
	Min	40.42	30.33	1.81	18.5	7.33	3.47	7.07	6.77	4.53	2.5	3.78	0.53	0.47	3.88	72.33	6.83	3.92	23.08
	Max	78	62.25	4.3	52.25	18.17	7.03	11.17	11.13	8.47	5.7	5.65	1.78	1.37	7.47	122.5	36.5	6.88	90.83
	SE(d)	1.89	1.84	0.18	1.86	0.58	0.13	0.26	0.15	0.11	0.09	0.09	0.05	0.05	0.1	0.87	0.73	0.29	2.97
	C.D. at 5%	3.74	3.64	0.36	3.67	1.14	0.26	0.51	0.29	0.22	0.18	0.17	0.1	0.1	0.2	1.72	1.45	0.57	5.87
	C.V. (%)	4.01	5.17	7.45	6.43	5.4	3.25	3.37	2.08	2.29	2.74	2.25	4.96	8.53	2.03	1.02	6.12	6.57	8.14

## Sheet: Table S3
Table S3. Grouping of genotypes based on hierarchical cluster analysis.
Clusters	No. of genotypes	Genotypes
Cluster I	19	Roshni, Yellow Stone, Pusa Shabnam, Fire Flame, Neel Rekha, Arka Nazrana, Pusa Urvashi, Suchitra, Pusa Gulal, Pusa Urmi, Pusa Chandni, Pusa Kiran, Peter Pear's, Apple Blossom, Punjab Glance, Arka Sapna, Punjab Glad 1, Punjab Glad 2, Arka Keshar
Cluster II	20	Kalima, True Love, Neelima, Malaviya Kundan, Pusa Suhagin, C.P.G, Punjab Dawn, Urmil, Amethyst, Creamy Green, Pusa Srijana, Lady Jane, Punjab Pink Elegance, Pusa Lohit, African Star, Malaviya Kiran, Fidelio, Punjab Lemon Delight, Surya Kiran, Arka Darshan
Cluster III (a)	5	Pusa Sindhuri, Eurovision, Nicole, Nova Lux, Pusa Red Valentine
Cluster III (b)	28	Aldebaran, Pusa Archana, Pusa Bindiya, Pusa Gunjan, GS-2, Anjali, Yellow Star, Arka Naveen, Punjab Morning, Pusa Manmohak, Pusa Chirag, Anglia, Pusa Sringarika, Summer Sunshine, Algarve, Friendship, Sancerre, Delhi Callianthus, Arka Aarti, Vink's Glory, Plumtart, Pink Lady, Pusa Shweta, Arka Gold, Arka Tilak, Arka Amar, Arka Aayush, Arka Poonam
Cluster IV	11	Jacksonville Gold, Vicki Linn, Tiger Flame, Rose Supreme, Pusa Shagun, Praha, Dhanvantari, Pusa Sarang, Pusa Mohini, Lucky Shamrock

## Sheet: Table S4
Table S4. Cluster wise mean data for 18 quantitative traits of gladiolus genotypes.
Characters		PH	LLB	WLB	RL	NFS	BL	FL	FW	TL	TW	ADL	AL	SLL	SL	TBF	DF	CD	CFW
I	Mean	50.66	39.05	2.53	33.44	12.75	5.03	9.45	8.73	5.74	3.83	4.56	1.27	0.68	5.93	110.63	11.83	4.4	29
	± SE	4.57	3.72	0.34	5.52	1.21	0.72	0.67	0.7	0.37	0.62	0.33	0.11	0.11	0.49	7.01	2.95	0.32	4.83
II	Mean	56.23	40.13	2.95	37.93	13.18	5.52	10.36	10.03	7.51	4.69	4.49	1.42	1.13	6.31	118.07	13.97	5.12	38.12
	± SE	5.95	3.96	0.56	1.35	1.7	0.69	0.39	0.75	0.97	0.77	0.35	0.15	0.21	0.78	1.46	3.87	0.46	9.87
III	Mean	60.99	45.12	2.86	30.29	11.32	4.18	8.99	8.39	5.55	3.83	4.6	1.28	0.66	5.6	97.24	12.26	5.73	49.1
	± SE	4.32	3.66	0.5	4.35	1.77	0.52	0.48	0.61	0.5	0.48	0.26	0.15	0.16	0.33	10.84	3.42	0.43	9.16
IV	Mean	65.64	49.92	3.2	31.13	11.85	6	9.99	9.19	6.16	3.93	4.91	1.41	0.66	6.39	108.68	12.88	5.87	56.32
	± SE	7.44	5.69	0.39	4.08	2.01	0.51	0.63	0.59	0.36	0.49	0.3	0.2	0.1	0.39	6.04	4.17	0.56	15.02
V	Mean	50.38	38.56	3.02	34.9	14.09	4.35	8.6	7.81	5.41	3.57	4.29	1.13	0.64	5.63	102.52	13.51	5.39	45.37
	± SE	3.05	2.03	0.47	5.96	2.1	0.6	0.66	0.58	0.47	0.47	0.28	0.22	0.15	0.7	8.51	4.53	0.59	10.03
VI	Mean	57.86	43.34	3.21	42.01	14.79	4.83	9.43	8.89	6.12	3.9	4.92	1.36	0.69	6.2	94.58	22.57	5.5	45.53
	± SE	5.44	2.9	0.64	6.38	1.76	0.63	0.57	0.47	0.44	0.46	0.3	0.18	0.13	0.27	9.81	5.75	0.43	9.55
VII	Mean	63.41	49.26	3.31	39.55	13.59	4.84	9.78	9.28	6.32	4.66	4.57	1.13	0.76	5.92	109.24	14.65	5.33	44.88
	± SE	5.81	5.31	0.28	6.09	1.98	0.47	0.43	0.68	0.31	0.51	0.31	0.2	0.14	0.32	7.37	3.52	0.55	7.62
